# Supplementary material for: Immune landscape and in vivo immunogenicity of NY-ESO-1 tumor antigen in advanced neuroblastoma patients
Source: PubMed Central journal article supplement (PMC6192300; doi:10.1186/s12885-018-4910-8), 2018-10-16
Supplement: 12885_2018_4910_MOESM4_ESM.pdf [file 12885_2018_4910_MOESM4_ESM.pdf]

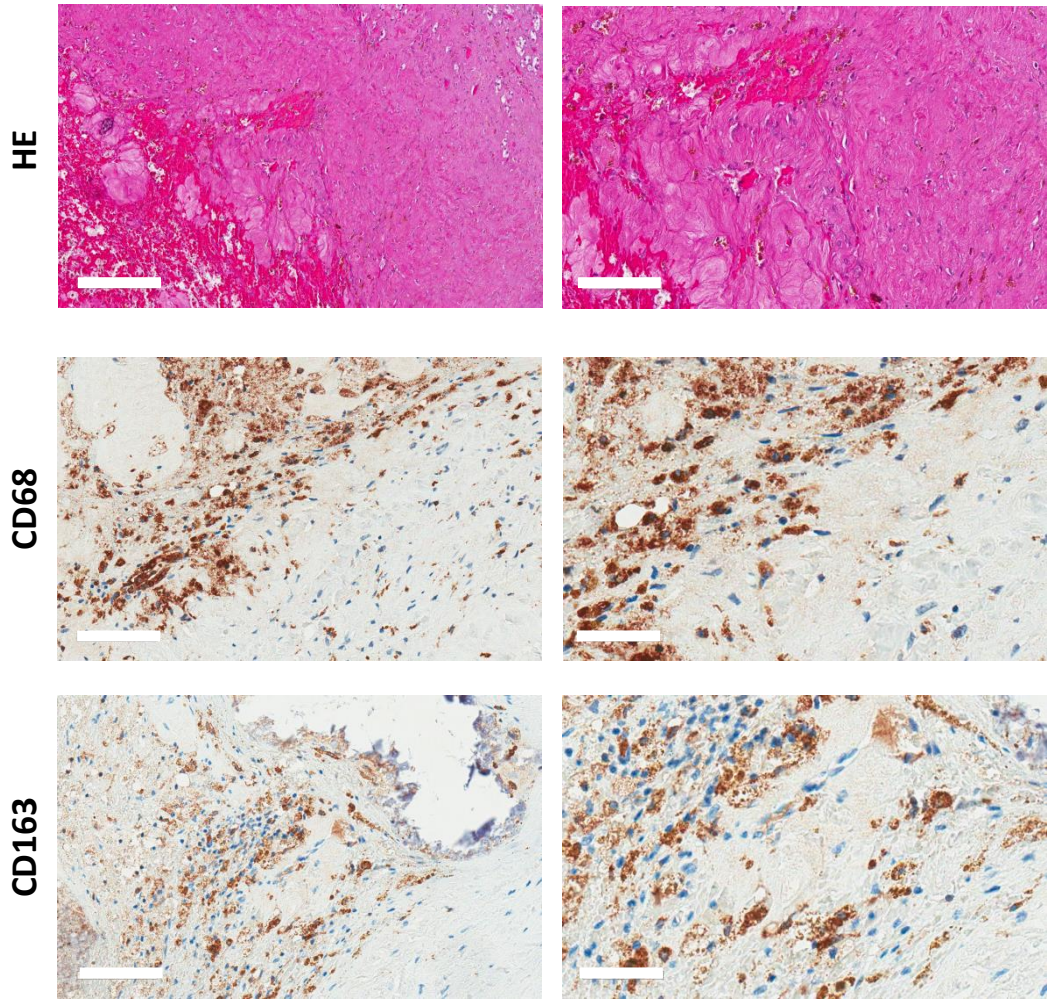

Figure S3
