# Supplementary material for: Immune landscape and in vivo immunogenicity of NY-ESO-1 tumor antigen in advanced neuroblastoma patients
Source: PubMed Central journal article supplement (PMC6192300; doi:10.1186/s12885-018-4910-8), 2018-10-16
Supplement: 12885_2018_4910_MOESM5_ESM.pdf [file 12885_2018_4910_MOESM5_ESM.pdf]

**CD8**

**Tbet**

**GZMB**

**PD-1**

**Pt1**

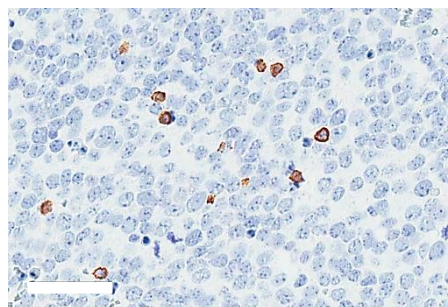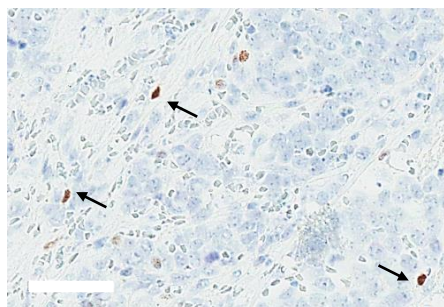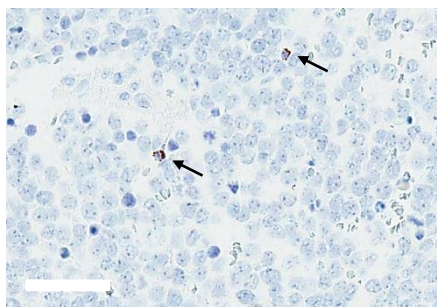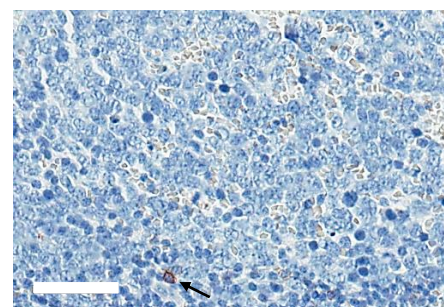

**Pt2**

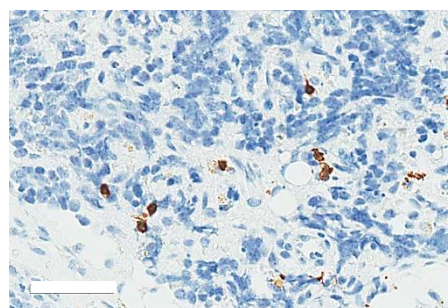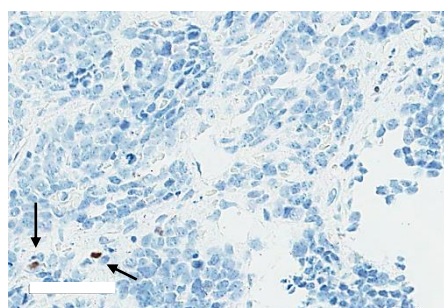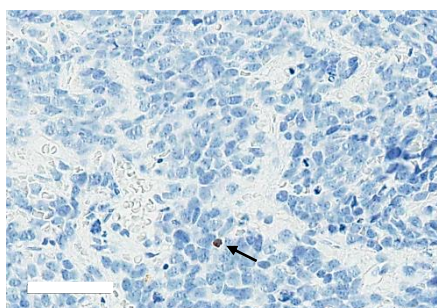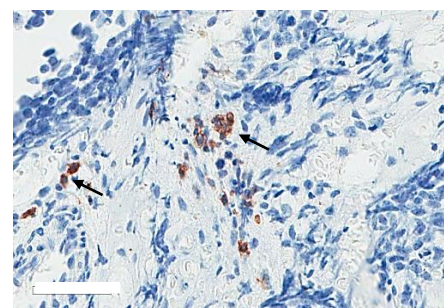

**Pt3**

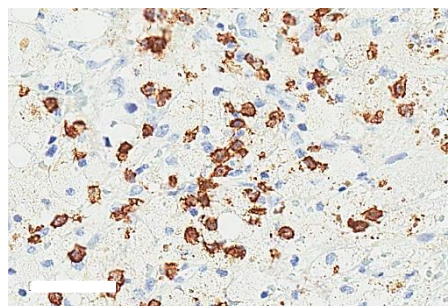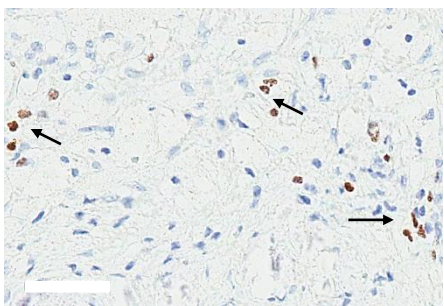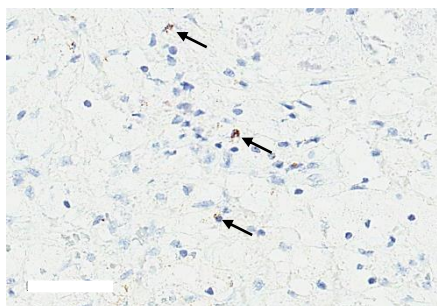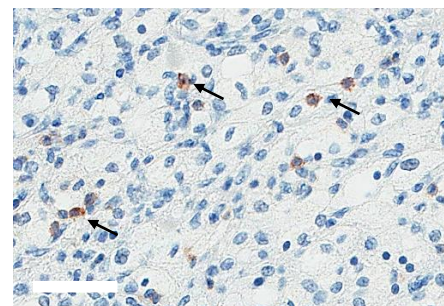

Figure S4
